# Supplementary material
Source: publisher figshare collection journal article supplement (https://karger.figshare.com/ndownloader/files/15049661)
Supplement: Supplementary file 1 [file 15049661]

Table S1 – Multivariable analysis for in-hospital mortality

| **Variable** | **OR (95% CI)** | **p-value** |
| --- | --- | --- |
| Age group |  |  |
| 18-59 | ref |  |
| 60-69 | 1.91 (1.27, 2.89) | 0.002 |
| 70-79 | 2.64 (1.80, 3.87) | <0.001 |
| 80-89 | 3.34 (2.28, 4.89) | <0.001 |
| ≥90 | 5.94 (3.77, 9.37) | <0.001 |
| Women | 0.68 (0.58, 0.81) | <0.001 |
| Diabetes mellitus | 1.63 (1.36, 1.94) | <0.001 |
| Ischemic heart disease | 1.28 (1.07, 1.55) | 0.009 |
| Pre-stroke mRS >2 | 1.35 (1.10, 1.66) | 0.005 |
| NIHSS at admission | 1.13 (1.11, 1.14) | <0.001 |
| Stroke aetiologies |  |  |
| Large artery atherosclerosis | ref |  |
| Cardioembolism | 1.26 (0.97, 1.64) | 0.086 |
| Lacunar | ne | - |
| Other uncommon causes | 2.25 (1.24, 4.07) | 0.008 |
| Indeterminate | 1.65 (1.27, 2.15) | <0.001 |
| Topographic classificationa |  |  |
| PACI | 0.49 (0.36, 0.66) | <0.001 |
| TACI | 1.39 (1.06, 1.82) | 0.017 |
| POCI | ref |  |
| LACI | 0.15 (0.04, 0.62) | 0.009 |
| Valid datab, N | 12383 (out of 13932) | |
| Hosmer-Lemeshow test, p-value | 0.401 | |
| AUC ROC (95% CI) | 0.874 (0.863, 0.885) | |
| a. Based on the criteria of the Oxfordshire Community Stroke Project.  b. Patients were excluded if they had no data in some covariate of the model.  OR, odds-ratio; CI, confidence interval; mRS, modified Rankin Scale; NIHSS, National Institutes of Health Stroke Scale; PACI, partial anterior circulation infarct; TACI, total anterior circulation infarct; POCI, posterior circulation infarct; LACI, lacunar infarct; ref, reference level; ne, not estimable; AUC, area under the curve. | | |
